# Supplementary material for: Impact of Frailty and Clonal Hematopoiesis on Cardiovascular Outcomes in Elderly Patients with Renal Artery Stenosis Undergoing Stenting
Source: Research Square preprint supplement (doi:10.21203/rs.3.rs-5117728/v1), 2024-11-19

### Supplementary File 1. Criteria of Fried frailty phenotype.

| Item                                                                                                            | Men                                                                                                                                                               | Women                                                                                                                                                   |
|-----------------------------------------------------------------------------------------------------------------|-------------------------------------------------------------------------------------------------------------------------------------------------------------------|---------------------------------------------------------------------------------------------------------------------------------------------------------|
| <b>Unintentional weight Loss</b>                                                                                | Weight loss more than 5% regular weight or 4.5 kilograms unintentionally in the past year                                                                         |                                                                                                                                                         |
| <b>Low Physical Activity</b>                                                                                    | < 383kcal per week                                                                                                                                                | < 270kcal per week                                                                                                                                      |
| Any of the described activities evaluated by short version of the Minnesota Leisure Time Activity questionnaire | Similar to taking a walk for less than 2.5 hours per week                                                                                                         | Similar to taking a walk for less than 2 hours per week                                                                                                 |
| <b>Physical exhaustion</b>                                                                                      | Assessed by self-report using the following questions:                                                                                                            |                                                                                                                                                         |
| Any phenomenon described by the right questions occurred for 3 days or more                                     | 1. How often in the last week did you feel that everything you did was an effort?<br><br>2. How often in the last week did you feel that you could not get going? |                                                                                                                                                         |
| <b>Muscle Weakness</b>                                                                                          | Average grip strength:                                                                                                                                            | Average grip strength:                                                                                                                                  |
| Grip strength measured by CAMRY electronic hand dynamometer for two times' average                              | $\leq 29\text{kg}$ , BMI $\leq 24.0$<br>$\leq 30\text{kg}$ , BMI 24.1-26.0<br>$\leq 30\text{kg}$ , BMI 26.1-28.0<br>$\leq 32\text{kg}$ , BMI > 28.0               | $\leq 17\text{kg}$ , BMI $\leq 23.0$<br>$\leq 17.3\text{kg}$ , BMI 23.1-26.0<br>$\leq 18\text{kg}$ , BMI 26.1-29.0<br>$\leq 21\text{kg}$ , BMI > 29.0 : |
| <b>Slowed Gait</b>                                                                                              | Walk speed:                                                                                                                                                       | Walk speed:                                                                                                                                             |
| The faster speed to walk 4 meters for two times, with or without a walking aid                                  | $\leq 0.65\text{m/s}$ , Height $\leq 173\text{cm}$<br>$\leq 0.76\text{m/s}$ , Height > 173cm :                                                                    | $\leq 0.65\text{m/s}$ , Height $\leq 159\text{cm}$ :<br>$\leq 0.76\text{m/s}$ , Height > 159cm :                                                        |

**Abbreviations:** BMI, body mass index.

**Table. Forty-six gene panel for targeted sequencing of CHIP mutations**

| Genes  | Chromosomes | Exons         | NM-Nr.         |
|--------|-------------|---------------|----------------|
| ABL1   | 9           | 4-6           | NM_007313.3    |
| ASXL1  | 20          | 13            | NM_015338.5    |
| ATRX   | X           | 8,10-11,17-31 | NM_000489.5    |
| BCOR   | X           | 2-15          | NM_021946.4    |
| BCORL1 | X           | 1-12          | NM_004333      |
| BRAF   | 7           | 15            | NM_005188.3    |
| CBL    | 11          | 8-9           | NM_000489.5    |
| CBLC   | 19          | 9,11          | NM_001123385.1 |
| CDKN2A | 9           | 1-3           | NM_00077.4     |
| CEBPA  | 19          | 1             | NM_004364.4    |
| CUX1   | 7           | 1-24          | NM_001202543   |
| DNMT3A | 2           | 2-23          | NM_022552.4    |
| ETV6   | 12          | 1-8           | NM_001987      |
| EZH2   | 7           | 2-20          | NM_004456.4    |
| FBXW7  | 4           | 9-11          | NM_033632      |
| FLT3   | 13          | 13-15,20      | NM_004119.2    |
| GATA2  | 3           | 2-6           | NM_033632      |
| GNAS   | 20          | 8-10          | NM_004119.2    |
| IDH1   | 2           | 4             | NM_032638.4    |
| IDH2   | 15          | 4             | NM_002168.3    |
| IKZF1  | 7           | 2-8           | NM_006060.6    |
| JAK2   | 9           | 12,14         | NM_004972      |
| JAK3   | 19          | 13            | NM_00215       |
| KDM6A  | X           | 1-29          | NM_021140      |
| KIT    | 4           | 2,8-11,13,17  | NM_000222.2    |
| KRAS   | 12          | 2-3           | NM_033360.3    |
| MPL    | 1           | 10            | NM_005373.2    |
| MYD88  | 3           | 3-5           | NM_002468      |
| NOTCH1 | 9           | 26-28,34      | NM_017617      |
| NPM1   | 5           | 11            | NM_002520.6    |

|        |    |                   |                |
|--------|----|-------------------|----------------|
| NRAS   | 1  | 2-3               | NM_002524.4    |
| PHF6   | X  | 2-10              | NM_032458.2    |
| PTEN   | 10 | 5,7               | NM_000314.8    |
| PTPN11 | 12 | 3,13              | NM_002834.4    |
| RAD21  | 8  | 2-14              | NM_006265      |
| RUX1   | 21 | 2-9               | NM_001754.4    |
| SF3B1  | 2  | 13-16             | NM_012433.3    |
| SMC1A  | X  | 2,11,16-17        | NM_006306.4    |
| SMC3   | 10 | 10,13,19,23,25,28 | NM_005445.4    |
| SRSF2  | 17 | 1                 | NM_003016      |
| STAG2  | X  | 3-35              | NM_001042749   |
| TET2   | 4  | 3-11              | NM_001127208.2 |
| TP53   | 17 | 2-11              | NM_000546.5    |
| U2AF1  | 21 | 2,6               | NM_006758.2    |
| WT1    | 11 | 7,9               | NM_024426.4    |
| ZRSR2  | X  | 1-11              | NM_005089.3    |

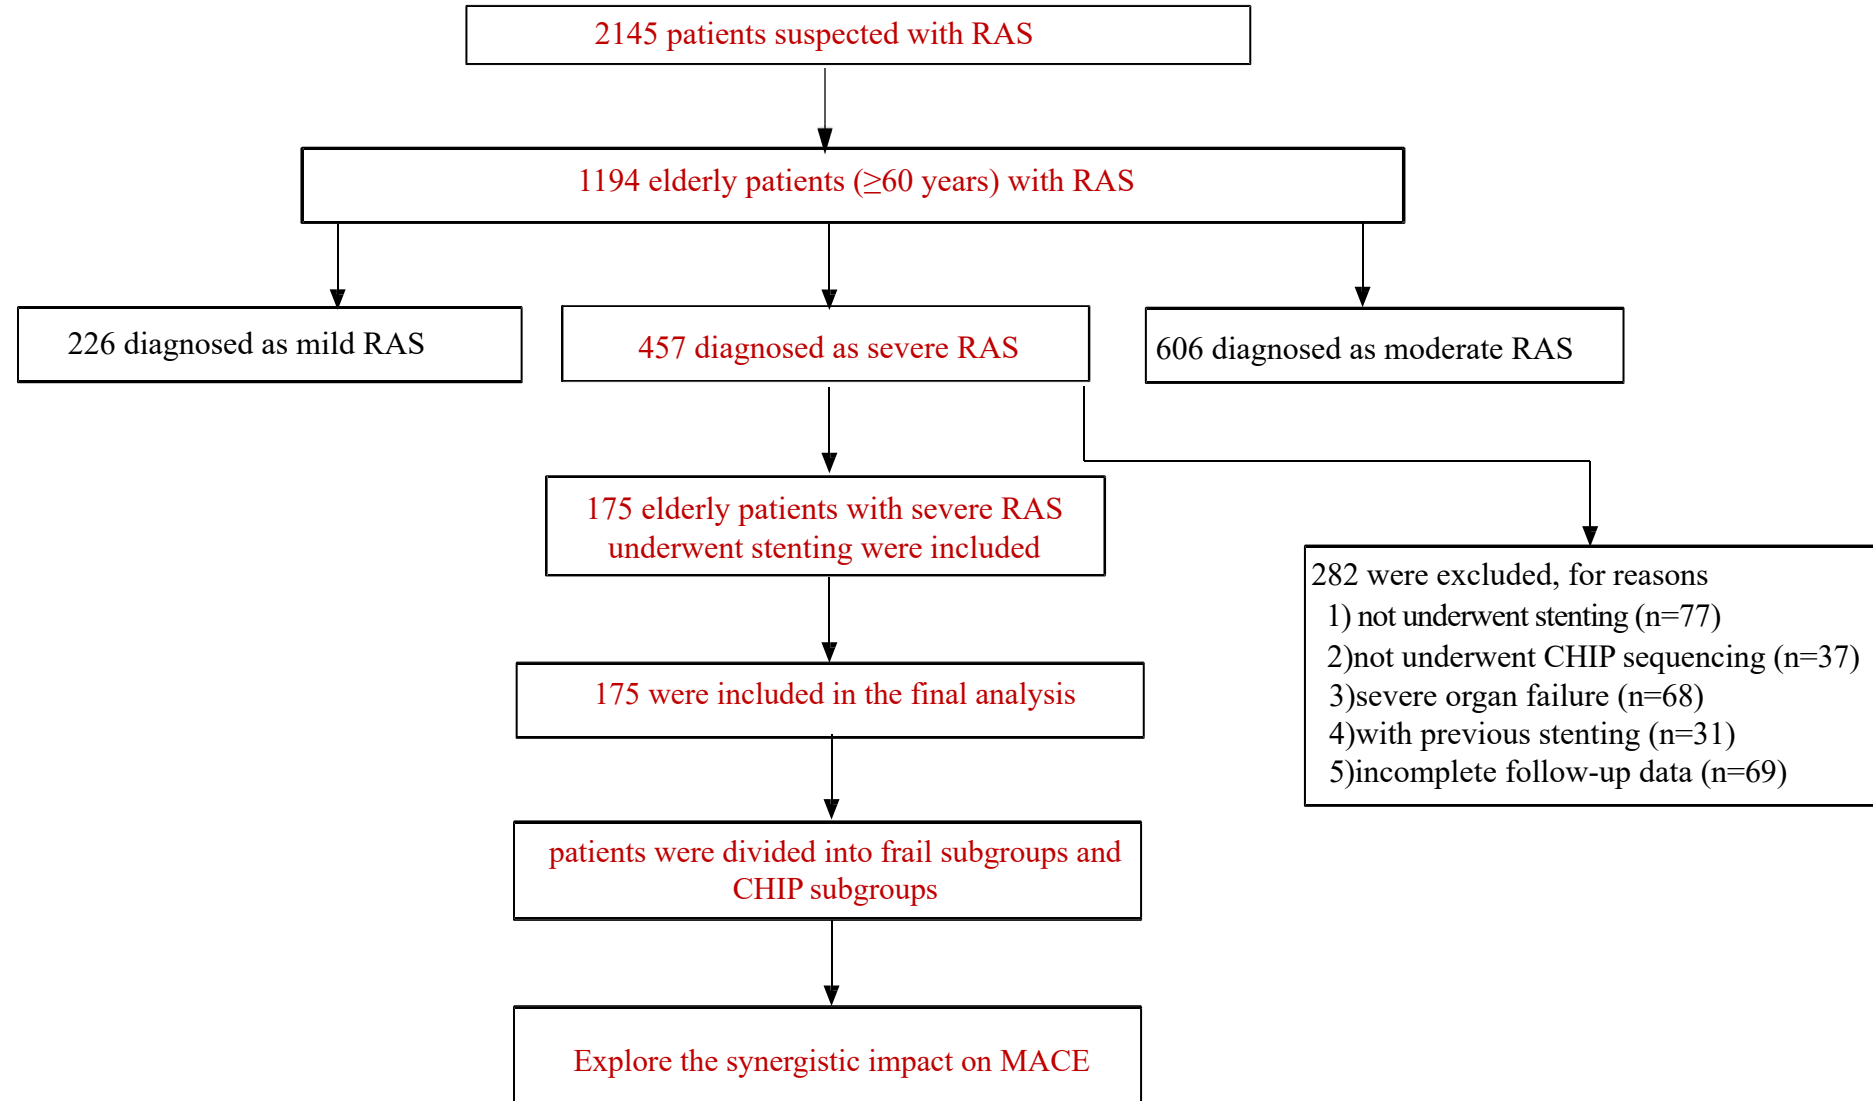

Supplement: Supplementary file 1 [file e4aebd3196e90c3b73e94130.pdf]
